# Supplementary material for: 3D correlative light and electron microscopy of cultured cells using serial blockface scanning electron microscopy
Source: Oxford University Press journal article supplement (doi:10.1242/jcs.188433), 2016-01-01
Supplement: jcs188433supp.pdf [file jcs188433supp.pdf]

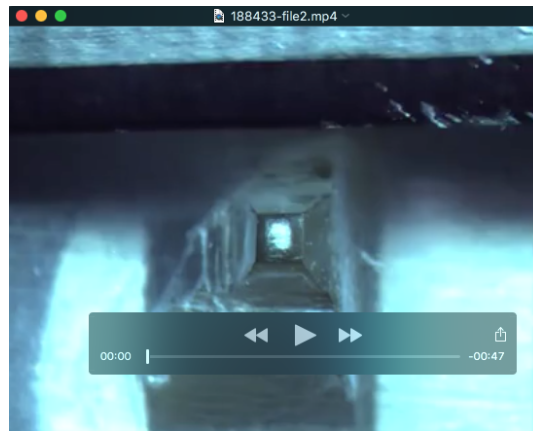

**Movie S1. Trimming of an ROI frustum from a block**

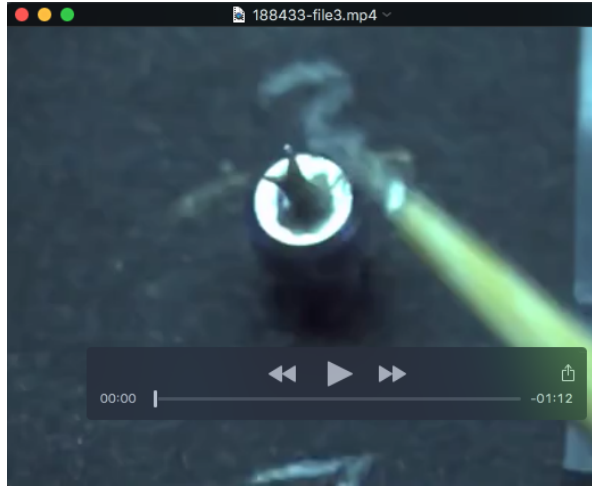

**Movie S2. Mounting of a frustum on to a pin.**

A small blob of conductive epoxy glue is first placed on the pin. After gently dislodging the frustum from the Parafilm™ (with the back of the frustum pointed upwards), a toothpick is used to lift it out of the Parafilm™ by placing a tip coated with conductive glue onto the back (i.e. opposite from the cell containing face). The frustum is then inverted so the face points upward, and the back placed onto the blob of conductive glue on the pin. A small amount of the glue was then brought up around the block sides (not shown).

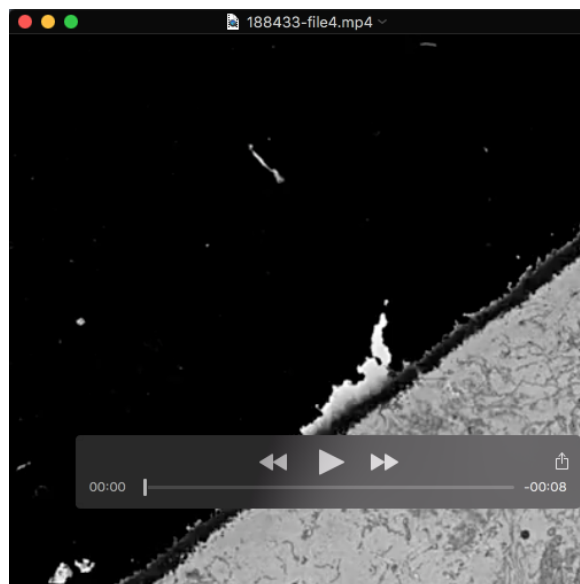

**Movie S3. SBF SEM of Vero E6 cells with isotropic 10 nm voxels.**

See <https://figshare.com/s/33a422c43fde70ac8580> for larger file.

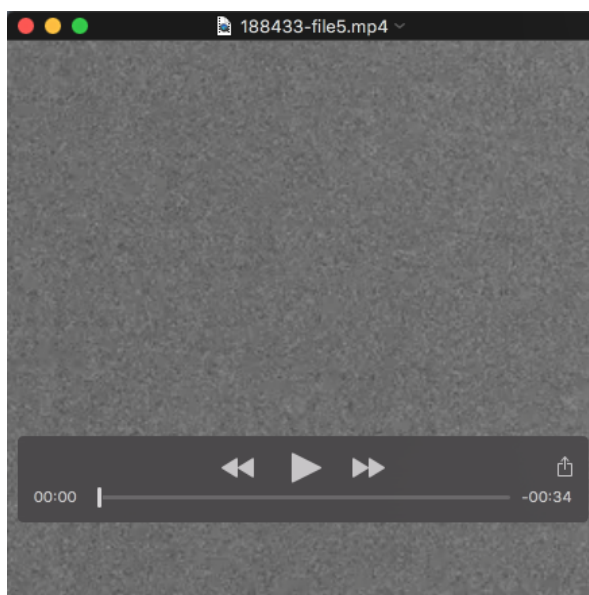

**Movie S4. SBF SEM of a cell-in-a-cell structure.**

See <https://figshare.com/s/33a422c43fde70ac8580> for larger file.

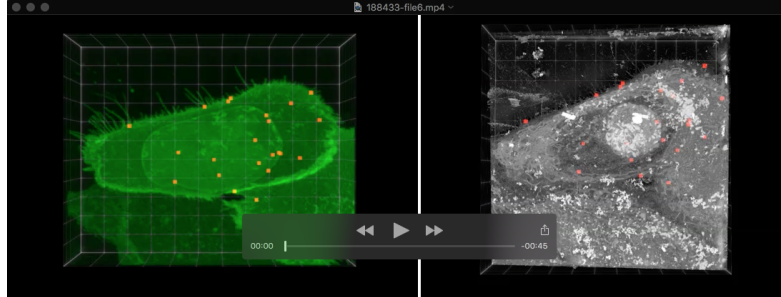

**Movie S5. 3D reconstructions of a cell-in-a-cell structure.** The raw live FM (GFP-PLCd-PH; top left) and SBF SEM data (top right) show the landmarks used to align the FM to the SBF SEM data in BigWarp. H264 compression. 5 frames per second.

**Table S1. Fluorescence light microscopy imaging parameters**

|                                                             | Fig 4-5, Mtb<br>(Lerner et al., 2016) | Fig 6, Mtb                 | Fig 7, Entosis         | Fig 8, HIV<br>(Nkwe et al., 2016) | Recommended                                             |
|-------------------------------------------------------------|---------------------------------------|----------------------------|------------------------|-----------------------------------|---------------------------------------------------------|
| <b>Live-/Fixed-cell imaging</b>                             | Live and fixed confocal               | Fixed confocal             | Live confocal          | Fixed widefield                   | Live and fixed confocal                                 |
| <b>Objective lens</b>                                       | 63x                                   | 63x                        | 40x                    | 20x                               | 40x or 63x                                              |
| <b>NA</b>                                                   | 1.4                                   | 1.4                        | 1.4                    | 0.3                               | 1.4                                                     |
| <b>Pinhole</b>                                              | 1 AU, 95.4 $\mu\text{m}$              | 1 AU, 95.4 $\mu\text{m}$   | 1 AU, 32 $\mu\text{m}$ | n/a                               | 1 AU                                                    |
| <b>Pixel dimensions</b>                                     | 1024 x 1024                           | 1024 x 1024                | 512 x 512              | 1392 x 1040                       | 1024 x 1024                                             |
| <b>Zoom</b>                                                 | 2                                     | 1                          | 2.2                    | n/a                               | 1 or 2                                                  |
| <b>Line averaging</b>                                       | 2                                     | 4                          | 1                      | n/a                               | 4                                                       |
| <b>Pixel dwell time</b>                                     | 2.1 $\mu\text{s}$ (400 Hz)            | 2.1 $\mu\text{s}$ (400 Hz) | 2.55 $\mu\text{s}$     | n/a                               | -                                                       |
| <b>Pixel size (<math>\mu\text{m}</math>)</b>                | 0.12                                  | 0.24                       | 0.189                  | 0.46                              | Nyquist sampling                                        |
| <b>Optical section thickness (<math>\mu\text{m}</math>)</b> | 0.771                                 | 0.771                      | 1.7                    | n/a                               | set by pinhole<br>( $\approx 0.7 \mu\text{m}$ for 1 AU) |
| <b>Number of slices</b>                                     | 5                                     | 1                          | 50                     | n/a                               | for whole cell volume                                   |
| <b>Step size (<math>\mu\text{m}</math>)</b>                 | 1.19                                  | n/a                        | 0.373                  | n/a                               | (1/2 of optical section thickness)                      |
| <b>HFW (xy <math>\mu\text{m}</math>)</b>                    | 123.02 x 123.02                       | 246.03 x 246.03            | 96.92 x 96.92          | 640.32 x 478.4                    | -                                                       |
| <b>Volume (xyz <math>\mu\text{m}</math>)</b>                | 123.02 x 123.02 x 5.95                | n/a                        | 96.92 x 96.92 x 18.63  | n/a                               | -                                                       |

NA – numerical aperture of the objective lens

AU – Airy unit

HFW – horizontal field width

n/a – not applicable

**Table S2. SBF SEM imaging parameters**

|                                | Fig 3A, MD4<br>Cell 15 nm cuts | Fig 3B-C, Vero<br>Cell 10 nm voxel | Fig 4-5, Mtb<br>(Lerner et al., 2016) | Fig 6, Mtb         | Fig 7, Entosis      | Fig 8, HIV<br>(Nkwe, et al., 2016) |
|--------------------------------|--------------------------------|------------------------------------|---------------------------------------|--------------------|---------------------|------------------------------------|
| <b>Vacuum (Pa)</b>             | High Vacuum                    | 5                                  | 10                                    | 10                 | 6                   | 5                                  |
| <b>Voltage (kV)</b>            | 2                              | 2                                  | 1.8                                   | 1.8                | 2                   | 2                                  |
| <b>Aperture (µm)</b>           | 30                             | 30                                 | 20                                    | 20                 | 20                  | 20                                 |
| <b>High current mode</b>       | No                             | No                                 | Yes                                   | Yes                | Yes                 | Yes                                |
| <b>Pixel dwell time (µs)</b>   | 2                              | 3                                  | 2                                     | 2                  | 2                   | 2                                  |
| <b>Pixel dimensions</b>        | 2048 x 2048                    | 8192 x 8192                        | 8192 x 8192                           | 8192 x 8192        | 8192 x 8192         | 8192 x 8192                        |
| <b>Lateral pixel size (nm)</b> | 15                             | 10                                 | 3                                     | 3.1                | 7                   | 4                                  |
| <b>Slice thickness (nm)</b>    | 15                             | 10                                 | 50                                    | 50                 | 50                  | 50                                 |
| <b>Slices</b>                  | 1000                           | 200                                | 68                                    | 37                 | 341                 | 300                                |
| <b>Volume (xyz µm)</b>         | 30.7 x 30.7 x 15               | 81.9 x 81.9 x 2                    | 24.3 x 24.3 x 3.4                     | 25.3 x 25.3 x 1.85 | 57.1 x 57.1 x 17.05 | 32.8 x 32.8 x 15                   |

Slice thickness – SBF SEM microtome thickness setting  
Slices – number of slices in the dataset

Table S3. Mtb 3D reconstruction model quantitation

| <b>Mtb</b> | <b>Mtb Volume<br/>(<math>\mu\text{m}^3</math>)</b> | <b>Closest distance to surrounding<br/>membrane (nm)</b> |
|------------|----------------------------------------------------|----------------------------------------------------------|
| 1          | 0.497                                              | 271*                                                     |
| 2          | 0.440                                              | 271*                                                     |
| 3          | 0.454                                              | 345                                                      |
| 4          | 0.283                                              | 866                                                      |
| 5          | 0.549                                              | 271*                                                     |
| 6          | 0.346                                              | 271*                                                     |
| 7          | 0.396                                              | 271*                                                     |
| 8          | 0.371                                              | 271*                                                     |
| 9          | 0.703                                              | 271*                                                     |
| 10         | 0.606                                              | 271*                                                     |
| 11         | 0.430                                              | 271*                                                     |
| 12         | 0.421                                              | 857                                                      |
| 13         | 0.528                                              | 271*                                                     |
| 14         | 0.299                                              | 347                                                      |
| 15         | 0.386                                              | 271*                                                     |
| 16         | 0.470                                              | 271*                                                     |
| 17         | 0.318                                              | 271*                                                     |
| 18         | 0.394                                              | 610                                                      |
| 19         | 0.297                                              | 271*                                                     |
| 20         | 0.469                                              | 271*                                                     |
| 21         | 0.404                                              | 277                                                      |
| 22         | 0.515                                              | 271*                                                     |
| 23         | 0.824                                              | 445                                                      |
| 24         | 0.361                                              | 655                                                      |
| 25         | 0.346                                              | 271*                                                     |
| 26         | 0.370                                              | 271*                                                     |
| 27         | 0.385                                              | 539                                                      |
| 28         | 0.354                                              | 271*                                                     |
| 29         | 0.315                                              | 852                                                      |
| 30         | 0.332                                              | 271*                                                     |
| 31         | 0.432                                              | 574                                                      |
| 32         | 1.018                                              | 452                                                      |
| 33         | 0.442                                              | 271*                                                     |
| 34         | 0.436                                              | 639                                                      |
| 35         | 0.364                                              | 728                                                      |
| 36         | 0.298                                              | 495                                                      |
| 37         | 0.412                                              | 271*                                                     |
| 38         | 0.386                                              | 271*                                                     |
| 39         | 0.521                                              | 271*                                                     |

**Average volume** 0.440

\*The real proximity of bacteria shown as 271 nm is equal to or less than this value (since the surrounding membrane was originally segmented as a 270 nm thick object, with the outer face following the electron density of the surrounding membrane, in order to prevent artefactual holes appearing in the surface, see Lerner et al., 2016).



Table S4. IPMC 3D reconstruction model quantitation

|                                           | IPMC Membrane area   |      | Virus buds |            | Virus buds/ $\mu\text{m}^2$ of membrane |
|-------------------------------------------|----------------------|------|------------|------------|-----------------------------------------|
|                                           | Area $\mu\text{m}^2$ | %    | number     | % of total |                                         |
| Whole IPMC                                | 1,444                | -    | 15,624     | -          | 10.8                                    |
| Compact domain<br>(Fig.8I,K; arrow)       | 223                  | 15.5 | 5,674      | 36.3       | 25.4                                    |
| Convolutd domain<br>(Fig.8I,K; arrowhead) | 1,220                | 84.5 | 9,950      | 63.7       | 8.2                                     |

Table S5. Mtb BigWarp landmarks

| Landmark | Landmark positions ( $\mu\text{m}$ ) |        |       |                  |        |       |
|----------|--------------------------------------|--------|-------|------------------|--------|-------|
|          | Moving (LM)                          |        |       | Target (SBF SEM) |        |       |
|          | x                                    | y      | z     | x                | y      | z     |
| Pt-0     | 72.265                               | 63.175 | 3.821 | 13.848           | 6.176  | 0.988 |
| Pt-1     | 70.266                               | 65.604 | 3.821 | 15.707           | 10.222 | 0.792 |
| Pt-2     | 69.530                               | 62.601 | 2.617 | 17.287           | 5.407  | 1.312 |
| Pt-3     | 72.738                               | 69.392 | 2.500 | 10.887           | 14.861 | 2.051 |
| Pt-4     | 69.749                               | 67.094 | 1.704 | 15.442           | 12.102 | 1.981 |
| Pt-5     | 70.355                               | 63.577 | 1.640 | 15.686           | 6.388  | 2.000 |
| Pt-6     | 75.106                               | 70.211 | 2.748 | 7.079            | 15.329 | 2.108 |

Table S6. Entosis BigWarp landmarks

| Landmark† | Landmark positions (µm) |        |        |                  |        |        |
|-----------|-------------------------|--------|--------|------------------|--------|--------|
|           | Moving (LM)             |        |        | Target (SBF SEM) |        |        |
|           | x                       | y      | z      | x                | y      | z      |
| Pt-0      | 45.571                  | 38.328 | 2.551  | 26.316           | 15.651 | 5.370  |
| Pt-1      | 52.014                  | 36.194 | 2.309  | 32.520           | 13.018 | 4.223  |
| Pt-2      | 71.733                  | 34.783 | 1.921  | 51.385           | 9.352  | 1.157  |
| Pt-3      | 27.016                  | 42.888 | 2.648  | 8.992            | 21.646 | 8.339  |
| Pt-4      | 52.990                  | 59.062 | 2.890  | 36.781           | 34.734 | 6.125  |
| Pt-5      | 51.402                  | 36.719 | 5.309  | 32.061           | 13.587 | 5.839  |
| Pt-6      | 38.215                  | 56.713 | 3.852  | 21.936           | 33.877 | 8.569  |
| Pt-9      | 58.704                  | 61.538 | 7.133  | 43.687           | 36.518 | 8.361  |
| Pt-10     | 38.360                  | 49.570 | 13.668 | 22.756           | 26.681 | 15.878 |
| Pt-11     | 63.257                  | 50.245 | 11.002 | 48.633           | 22.205 | 9.360  |
| Pt-12     | 64.647                  | 49.555 | 10.498 | 48.925           | 21.330 | 8.776  |
| Pt-13     | 74.746                  | 41.195 | 7.467  | 56.124           | 16.466 | 4.787  |
| Pt-14     | 61.223                  | 40.107 | 6.502  | 41.726           | 14.423 | 5.857  |
| Pt-15     | 67.434                  | 37.173 | 6.208  | 46.493           | 12.282 | 4.690  |
| Pt-16     | 69.843                  | 50.849 | 7.879  | 52.136           | 25.513 | 6.441  |
| Pt-17     | 49.153                  | 55.442 | 10.986 | 34.916           | 30.961 | 13.056 |
| Pt-18     | 47.958                  | 51.469 | 14.437 | 33.846           | 26.778 | 13.835 |
| Pt-19     | 64.692                  | 49.753 | 6.390  | 48.341           | 22.692 | 5.663  |
| Pt-21     | 58.479                  | 46.449 | 8.516  | 40.833           | 21.811 | 7.961  |
| Pt-22     | 59.399                  | 52.308 | 8.053  | 42.403           | 26.206 | 7.988  |
| Pt-23     | 61.707                  | 54.182 | 6.749  | 45.715           | 28.706 | 6.835  |
| Pt-24     | 62.077                  | 41.364 | 9.538  | 44.828           | 15.580 | 7.828  |

†Landmarks 7, 8 and 20 were removed during refinement of the alignment
